# Supplementary material for: Stabilizing Halogen-Bonded Complex between Metallic Anion and Iodide
Source: MDPI journal article supplement (doi:10.3390/molecules27228069), 2022-11-21
Supplement: s1 [file s1]

# Supporting Information

## Stabilizing Halogen-Bonded Complex between Metallic Anion and Iodide

*Fei Ying<sup>1</sup>, Xu Yuan<sup>2,3</sup>, Xinxing Zhang<sup>2,3\*</sup>, Jing Xie<sup>1\*</sup>*

- 1** Key Laboratory of Cluster Science of Ministry of Education, Beijing Key Laboratory of Photoelectronic/Electrophotonic Conversion Materials, School of Chemistry and Chemical Engineering, Beijing Institute of Technology, Beijing 100081, China
- 2** College of Chemistry, Key Laboratory of Advanced Energy Materials Chemistry (Ministry of Education), Renewable Energy Conversion and Storage Center (ReCAST), Tianjin Key Laboratory of Biosensing and Molecular Recognition, Shenzhen Research Institute, Frontiers Science Center for New Organic Matter, Nankai University, Tianjin, 300071, China.
- 3** Haihe Laboratory of Sustainable Chemical Transformations, Tianjin 300192, China.

### Corresponding Authors

Xinxing Zhang, e-mail: zhangxx@nankai.edu.cn

Jing Xie, e-mail: jingxie@bit.edu.cn

## Table of Contents

|                                                                                       |    |
|---------------------------------------------------------------------------------------|----|
| Table of Contents                                                                     | S2 |
| Figure S1      Optimized structure of $\text{Mn}(\text{CO})_5^-$ anion                | S3 |
| Figure S2      CID fragments of the $\text{Mn}(\text{CO})_5^-$ anion                  | S4 |
| Figure S3      Optimized structures of $\text{CH}_3\text{I}-\text{Mn}(\text{CO})_3^-$ | S5 |
| Figure S4      Additional conformers of RC                                            | S6 |
| Cartesian coordinates of calculated structures                                        | S7 |

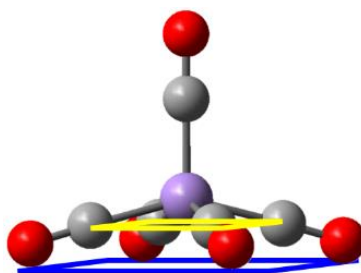

**Figure S1.** Optimized structure of  $\text{Mn}(\text{CO})_5^-$  anion. Color code: C, grey; O, red; Mn, purple.

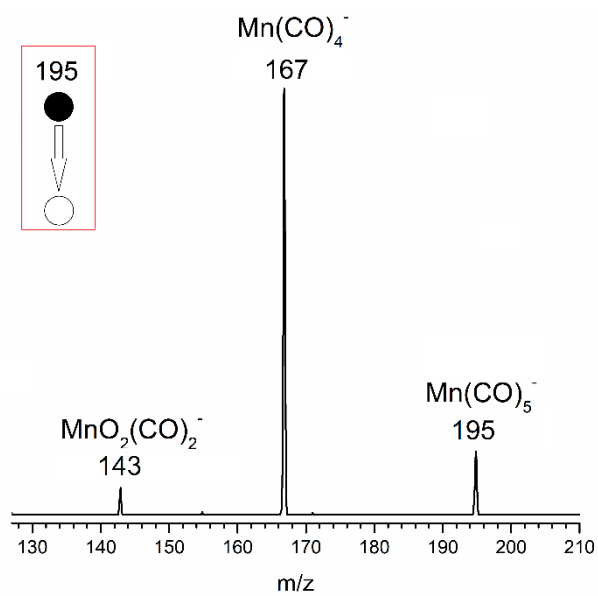

**Figure S2.** CID fragments of the  $\text{Mn(CO)}_5^-$  anion.

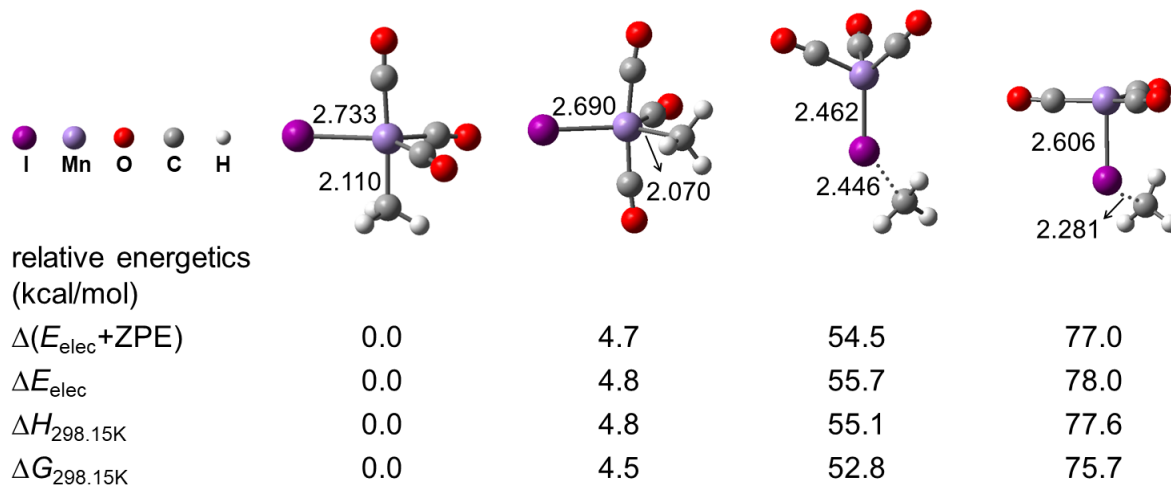

**Figure S3.** Optimized structures of  $\text{CH}_3\text{I-Mn(CO)}_3^-$ . Relative energetic values are reported.

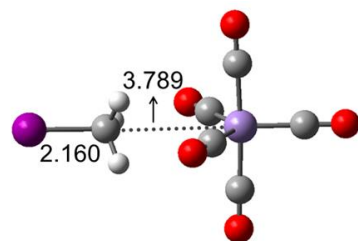

**RC1**

$$\Delta(E_{\text{elec}} + \text{ZPE}) = -7.6 \text{ kcal/mol}$$

$$\Delta E_{\text{elec}} = -8.1 \text{ kcal/mol}$$

$$\Delta H_{298.15\text{k}} = -6.8 \text{ kcal/mol}$$

$$\Delta G_{298.15\text{k}} = 0.5 \text{ kcal/mol}$$

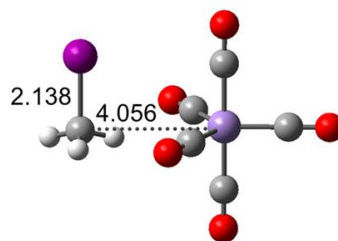

**RC2**

$$\Delta(E_{\text{elec}} + \text{ZPE}) = -5.6 \text{ kcal/mol}$$

$$\Delta E_{\text{elec}} = -6.3 \text{ kcal/mol}$$

$$\Delta H_{298.15\text{k}} = -4.4 \text{ kcal/mol}$$

$$\Delta G_{298.15\text{k}} = 0.7 \text{ kcal/mol}$$

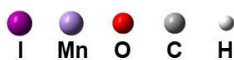

**Figure S4.** Additional conformers of the pre-reaction complex (RC) of  $\text{CH}_3\text{I}$  reacting with  $\text{Mn}(\text{CO})_5^-$ . Energetic values are given in relative to the total energy of isolated  $\text{Mn}(\text{CO})_5^-$  and  $\text{CH}_3\text{I}$ .

**Cartesian coordinates (Å) of all calculated structures for Mn(CO)<sub>5</sub><sup>-</sup> + CR<sub>3</sub>I reactions (R = H, F).**

**Mn(CO)<sub>5</sub><sup>-</sup>**

|    |             |             |             |
|----|-------------|-------------|-------------|
| Mn | 0.00000000  | 0.00000000  | -0.01271400 |
| C  | 0.00000000  | 1.77338200  | 0.43836200  |
| C  | -1.77338200 | 0.00000000  | 0.43836200  |
| C  | 0.00000000  | -1.77338200 | 0.43836200  |
| C  | 1.77338200  | 0.00000000  | 0.43836200  |
| C  | 0.00000000  | 0.00000000  | -1.78591700 |
| O  | -2.88192900 | 0.00000000  | 0.75057700  |
| O  | 0.00000000  | 2.88192900  | 0.75057700  |
| O  | 0.00000000  | 0.00000000  | -2.93822600 |
| O  | 2.88192900  | 0.00000000  | 0.75057700  |
| O  | 0.00000000  | -2.88192900 | 0.75057700  |

**XC**

|    |             |             |             |
|----|-------------|-------------|-------------|
| Mn | 1.57003600  | -0.00048900 | 0.00044000  |
| C  | 1.14385200  | 1.75225500  | 0.34711600  |
| C  | 1.14040700  | 0.34712300  | -1.75117200 |
| C  | 1.13917500  | -1.75152200 | -0.34951800 |
| C  | 1.13973500  | -0.34957600 | 1.75166200  |
| C  | 3.34562600  | -0.00106800 | 0.00123200  |
| O  | 0.84083400  | 0.56245000  | -2.83940800 |
| O  | 0.84696400  | 2.84134900  | 0.56155400  |
| O  | 4.49626500  | -0.00117000 | 0.00159700  |
| O  | 0.84029400  | -0.56714800 | 2.83946100  |
| O  | 0.83803500  | -2.83870700 | -0.56775200 |
| I  | -2.08191700 | 0.00075000  | 0.00043600  |
| C  | -4.24928500 | 0.00161800  | 0.00069200  |
| H  | -4.58802200 | 1.01354100  | 0.19309000  |
| H  | -4.58874400 | -0.33756000 | -0.97166500 |
| H  | -4.58869900 | -0.67067900 | 0.78079500  |

**XC'**

|    |             |             |             |
|----|-------------|-------------|-------------|
| Mn | -1.99192500 | 0.00006700  | 0.00007400  |
| C  | -1.62118400 | -0.17552800 | 1.80610800  |
| C  | -1.62483200 | -1.80685400 | -0.17552200 |
| C  | -1.62295200 | 0.17552200  | -1.80628900 |
| C  | -1.62493300 | 1.80701600  | 0.17561900  |
| C  | -3.77608300 | 0.00001300  | 0.00084200  |
| O  | -1.36761500 | -2.91597400 | -0.28373500 |
| O  | -1.36079000 | -0.28362700 | 2.91453500  |

|   |             |             |             |
|---|-------------|-------------|-------------|
| O | -4.92235400 | -0.00046600 | 0.00131400  |
| O | -1.36656400 | 2.91591800  | 0.28332200  |
| O | -1.36366500 | 0.28371600  | -2.91498000 |
| I | 1.23201700  | 0.00025100  | -0.00011200 |
| C | 3.48684800  | -0.00024900 | -0.00012700 |
| F | 4.00910800  | -0.12826600 | 1.23598100  |
| F | 4.00895900  | -1.00699200 | -0.72883800 |
| F | 4.00948300  | 1.13403200  | -0.50751700 |

# **RC**

|    |             |             |             |
|----|-------------|-------------|-------------|
| Mn | 2.22667400  | 0.03446600  | -0.00038600 |
| C  | 1.45198200  | -0.22056400 | 1.60336500  |
| C  | 1.58500400  | 1.76073100  | 0.00027400  |
| C  | 1.40019400  | -0.23572700 | -1.57631100 |
| C  | 2.75238000  | -1.73532100 | -0.00044700 |
| C  | 3.93313900  | 0.59802800  | -0.03012600 |
| O  | 1.15551300  | 2.82361500  | -0.00103100 |
| O  | 0.92699000  | -0.38480200 | 2.62004100  |
| O  | 5.02610500  | 0.96192700  | -0.04885700 |
| O  | 3.06655800  | -2.83644900 | -0.00009600 |
| O  | 0.84269000  | -0.41095800 | -2.57334700 |
| C  | -1.56579100 | -0.06424300 | 0.00606300  |
| H  | -1.24116400 | 0.93231300  | -0.26223200 |
| H  | -1.25124200 | -0.79325700 | -0.72775300 |
| H  | -1.25424500 | -0.33266800 | 1.00609200  |
| I  | -3.72461300 | -0.04739900 | 0.00005500  |

# **RC1**

|    |             |             |             |
|----|-------------|-------------|-------------|
| Mn | -2.22195200 | 0.00308600  | -0.00195700 |
| C  | -1.44042200 | -0.01381300 | 1.61801000  |
| C  | -2.20219800 | -1.84165900 | -0.01027400 |
| C  | -1.32352800 | -0.01210200 | -1.56198400 |
| C  | -2.13127100 | 1.84544700  | -0.00658200 |
| C  | -4.01769100 | 0.03696400  | -0.05853900 |
| O  | -2.17594200 | -2.98673600 | -0.01895500 |
| O  | -0.91317300 | -0.02536800 | 2.64677600  |
| O  | -5.16901400 | 0.05879000  | -0.09513100 |
| O  | -2.05972300 | 2.98866000  | -0.01307400 |
| O  | -0.71821700 | -0.02205700 | -2.54632400 |
| C  | 1.56585300  | -0.02438900 | 0.06599000  |
| H  | 1.23829600  | -0.88934100 | -0.49408100 |
| H  | 1.22095800  | 0.89170100  | -0.39357700 |



|   |            |             |             |
|---|------------|-------------|-------------|
| H | 1.28501800 | -0.08439800 | 1.10848000  |
| I | 3.72431400 | -0.00083200 | -0.00449000 |

# **RC2**

|    |             |             |             |
|----|-------------|-------------|-------------|
| Mn | 1.75056800  | -0.08417000 | -0.00153100 |
| C  | 0.92108400  | -1.73710000 | -0.04762200 |
| C  | 1.04539200  | 0.22382200  | 1.62244200  |
| C  | 2.56378700  | 1.56751300  | 0.04344300  |
| C  | 0.84656100  | 0.40464900  | -1.47286700 |
| C  | 3.35913500  | -0.88382400 | -0.14671100 |
| O  | 0.56917300  | 0.44462100  | 2.65154800  |
| O  | 0.41552000  | -2.76290300 | -0.07768700 |
| O  | 4.39021800  | -1.39195800 | -0.24074700 |
| O  | 0.23723800  | 0.74171600  | -2.39610100 |
| O  | 3.06451000  | 2.59846900  | 0.07168200  |
| C  | -1.86783000 | 1.74597300  | -0.07446600 |
| H  | -2.44914600 | 2.42292000  | 0.53875000  |
| H  | -1.85370400 | 2.04154700  | -1.11580800 |
| H  | -0.86124800 | 1.59659600  | 0.30050900  |
| I  | -2.81551200 | -0.16835100 | 0.01320600  |

# **RC'**

|    |             |             |             |
|----|-------------|-------------|-------------|
| Mn | -2.53040500 | 0.04105100  | -0.00001300 |
| C  | -1.75061600 | -0.41040400 | 1.55544400  |
| C  | -3.43749800 | -1.56322900 | -0.00035200 |
| C  | -1.75137800 | -0.40822700 | -1.55640400 |
| C  | -1.62655200 | 1.64690900  | 0.00138900  |
| C  | -4.09820000 | 0.92481000  | 0.00021700  |
| O  | -4.00252800 | -2.56037400 | -0.00034100 |
| O  | -1.24438600 | -0.71065400 | 2.54922200  |
| O  | -5.10335900 | 1.49236200  | 0.00043800  |
| O  | -1.06113900 | 2.64434800  | 0.00244300  |
| O  | -1.24558100 | -0.70705300 | -2.55081000 |
| C  | 1.59252600  | -0.01306500 | -0.00017700 |
| F  | 1.13296900  | -1.24450800 | -0.00043300 |
| F  | 1.17468300  | 0.61948500  | -1.07521800 |
| F  | 1.17456900  | 0.61909200  | 1.07505600  |
| I  | 3.76615900  | -0.06231500 | -0.00005000 |

# **TS1**

|    |             |             |             |
|----|-------------|-------------|-------------|
| Mn | -1.97858700 | 0.00000300  | -0.00513600 |
| C  | -1.69605100 | 0.00186400  | 1.82449000  |
| C  | -1.61654300 | -1.81677400 | 0.01300600  |

|   |             |             |             |
|---|-------------|-------------|-------------|
| C | -1.52616000 | -0.00188800 | -1.80242900 |
| C | -1.61611200 | 1.81673400  | 0.00926900  |
| C | -3.76400000 | 0.00011400  | -0.08228800 |
| O | -1.34795300 | -2.92826700 | 0.02324500  |
| O | -1.47689800 | 0.00302100  | 2.94700300  |
| O | -4.90777900 | 0.00018700  | -0.13332700 |
| O | -1.34724400 | 2.92817800  | 0.01722700  |
| O | -1.19814400 | -0.00301700 | -2.89784600 |
| C | 0.89224300  | -0.00000200 | 0.00202300  |
| H | 0.85808700  | -0.92893300 | -0.53265800 |
| H | 0.85813900  | 0.92683500  | -0.53628500 |
| H | 0.84762300  | 0.00209600  | 1.07335300  |
| I | 3.49216400  | -0.00002200 | 0.01300300  |

**TS1'**

|    |             |             |             |
|----|-------------|-------------|-------------|
| Mn | 2.27901400  | 0.00026400  | -0.00712300 |
| C  | 1.89472200  | 1.80426400  | -0.10762000 |
| C  | 1.73372900  | -0.13587400 | -1.76588800 |
| C  | 1.91966600  | -1.80360100 | 0.16196300  |
| C  | 2.04938800  | 0.13500800  | 1.81936000  |
| C  | 4.06677000  | 0.00125900  | -0.15427900 |
| O  | 1.33720600  | -0.21908400 | -2.83613600 |
| O  | 1.60232300  | 2.90796600  | -0.16996300 |
| O  | 5.20666300  | 0.00184800  | -0.25320300 |
| O  | 1.84299700  | 0.21768700  | 2.94059700  |
| O  | 1.64151000  | -2.90793600 | 0.26403200  |
| C  | -0.81260200 | -0.00114300 | -0.01163000 |
| F  | -0.81673100 | -1.16717400 | -0.53611700 |
| F  | -0.79788000 | 0.13032700  | 1.25956500  |
| F  | -0.82010600 | 1.03314800  | -0.76314600 |
| I  | -3.64563300 | 0.00044100  | 0.02493100  |

**TS2**

|    |            |             |             |
|----|------------|-------------|-------------|
| Mn | 1.51253500 | -0.11239600 | -0.06103700 |
| C  | 0.57522500 | -1.69030500 | 0.37730700  |
| C  | 1.75760200 | 0.15630300  | 1.75682300  |
| C  | 1.92914600 | 1.68066200  | -0.27956600 |
| C  | 0.57528900 | 0.03737700  | -1.68038600 |
| C  | 3.02842900 | -0.91930900 | -0.55602100 |
| O  | 1.87650500 | 0.36958900  | 2.87527400  |
| O  | 0.06335000 | -2.65702800 | 0.67873800  |
| O  | 4.01796300 | -1.40187700 | -0.86977900 |

|   |             |             |             |
|---|-------------|-------------|-------------|
| O | 0.01703300  | 0.18106500  | -2.66238000 |
| O | 2.03640100  | 2.81948700  | -0.34286800 |
| C | -0.83258700 | 2.01387800  | 0.53702200  |
| H | -1.81797200 | 2.26030200  | 0.88439600  |
| H | -0.58347000 | 2.35130000  | -0.45626700 |
| H | -0.05661800 | 2.06788000  | 1.28078800  |
| I | -2.67252800 | -0.11379500 | 0.02743500  |

**TS2'**

|    |             |             |             |
|----|-------------|-------------|-------------|
| Mn | -1.70940000 | -0.27342400 | 0.00012000  |
| C  | -0.56399900 | -0.93888300 | -1.36536800 |
| C  | -2.49165600 | 0.81936900  | -1.30686200 |
| C  | -2.49121200 | 0.82142200  | 1.30566400  |
| C  | -0.56373400 | -0.93705600 | 1.36629000  |
| C  | -2.94608100 | -1.56131800 | 0.00120500  |
| O  | -2.98084100 | 1.47843800  | -2.09665000 |
| O  | 0.06505900  | -1.29593300 | -2.23875600 |
| O  | -3.73663300 | -2.38675200 | 0.00191000  |
| O  | 0.06551900  | -1.29293100 | 2.24001100  |
| O  | -2.98017500 | 1.48176500  | 2.09452700  |
| C  | 0.99719200  | 1.53650100  | -0.00058100 |
| I  | 2.70424100  | -0.58791900 | 0.00008000  |
| F  | 0.31203100  | 1.92275100  | 1.09624700  |
| F  | 2.07742400  | 2.34137700  | -0.00129600 |
| F  | 0.31095800  | 1.92236200  | -1.09691100 |

**PC1**

|    |             |             |             |
|----|-------------|-------------|-------------|
| Mn | 1.37321600  | -0.00012600 | 0.00297200  |
| C  | 2.60597700  | -1.31111400 | 0.48656000  |
| C  | 0.30671600  | -1.37753500 | -0.87976600 |
| C  | 0.30942400  | 1.38375200  | -0.87290100 |
| C  | 2.60960400  | 1.30558800  | 0.49129100  |
| C  | 0.41962400  | -0.00269100 | 1.64853000  |
| O  | -0.12901600 | -2.21718500 | -1.49111400 |
| O  | 3.41317300  | -2.08614200 | 0.68468700  |
| O  | -0.01687500 | -0.00380800 | 2.69013600  |
| O  | 3.41945700  | 2.07733000  | 0.69148700  |
| O  | -0.12561400 | 2.22690700  | -1.47986800 |
| C  | 2.44885900  | 0.00448100  | -1.90166600 |
| H  | 1.74072400  | -0.00192400 | -2.73239500 |
| H  | 3.07868400  | 0.88777800  | -2.02578100 |
| H  | 3.09188200  | -0.86960500 | -2.02280700 |

|             |             |             |             |
|-------------|-------------|-------------|-------------|
| I           | -2.77230000 | -0.00009100 | 0.07758100  |
| <b>PC1'</b> |             |             |             |
| Mn          | 0.93951700  | 0.38451400  | -0.00063800 |
| C           | 1.96691500  | 1.22400800  | 1.33763500  |
| C           | 0.00253000  | -0.65919800 | 1.40665000  |
| C           | 0.00398100  | -0.66721400 | -1.40247600 |
| C           | 1.96898000  | 1.21572800  | -1.34225500 |
| C           | -0.36381100 | 1.82517000  | -0.00533500 |
| O           | -0.37183400 | -1.27348200 | 2.26830500  |
| O           | 2.61460200  | 1.70055400  | 2.13386400  |
| O           | -0.94799300 | 2.78902600  | -0.00851900 |
| O           | 2.61846800  | 1.68670600  | -2.14034800 |
| O           | -0.37026500 | -1.28663900 | -2.26050400 |
| C           | 2.44300100  | -1.09024600 | 0.00275200  |
| F           | 2.44559900  | -1.94520400 | 1.07516700  |
| F           | 2.45958000  | -1.93387500 | -1.07872500 |
| F           | 3.72495800  | -0.57707400 | 0.01355900  |
| I           | -3.12514300 | -0.17974100 | 0.00003300  |
| <b>TS3</b>  |             |             |             |
| Mn          | -1.35623300 | -0.06512000 | 0.04624100  |
| C           | -1.97686800 | 1.61106500  | -0.40080000 |
| C           | -0.20868200 | 0.78022100  | 1.40423500  |
| C           | -0.21965800 | -1.64900400 | -0.09610400 |
| C           | -2.53888600 | -0.75851700 | -1.23077400 |
| C           | -2.43223300 | -0.68251200 | 1.37763600  |
| O           | 0.27754600  | 1.31021500  | 2.26941500  |
| O           | -2.53437700 | 2.62775500  | -0.55252200 |
| O           | -3.16276000 | -0.99450100 | 2.19567800  |
| O           | -3.29266400 | -1.15000800 | -1.98308200 |
| O           | 0.25601000  | -2.66778300 | -0.18039300 |
| C           | -0.51412200 | 1.38418500  | -1.53153100 |
| H           | 0.00076600  | 2.29511900  | -1.24148500 |
| H           | 0.24953300  | 0.61102900  | -1.61573300 |
| H           | -1.02704200 | 1.51821600  | -2.48011300 |
| I           | 2.82406100  | 0.00161400  | -0.13108400 |
| <b>TS3'</b> |             |             |             |
| Mn          | -1.08516600 | -0.61386400 | 0.04485900  |
| C           | -1.97055200 | 0.77301700  | 0.96997800  |
| C           | 0.17110800  | -0.69953100 | 1.59311500  |
| C           | 0.15548200  | -1.53203900 | -1.19871700 |

|   |             |             |             |
|---|-------------|-------------|-------------|
| C | -2.40995700 | -0.50648000 | -1.30015700 |
| C | -1.87699700 | -2.13431900 | 0.67142100  |
| O | 0.63344300  | -0.83375100 | 2.61026000  |
| O | -2.62022900 | 1.40820200  | 1.70504500  |
| O | -2.42054800 | -3.03916300 | 1.09480300  |
| O | -3.25242900 | -0.48102200 | -2.05529300 |
| O | 0.66947900  | -2.16266900 | -1.97724200 |
| C | -1.03941300 | 1.97440600  | -0.15411600 |
| F | -0.34483800 | 2.79532800  | 0.63597300  |
| F | -0.25205800 | 1.68555900  | -1.21795400 |
| F | -2.06328900 | 2.69979100  | -0.66469400 |
| I | 2.80783100  | 0.08183800  | -0.08322900 |

# **PC2**

|    |             |             |             |
|----|-------------|-------------|-------------|
| Mn | -0.72000100 | 0.35574700  | -0.00001500 |
| C  | -0.67608000 | 0.05406100  | 1.85394900  |
| C  | -2.51381600 | 0.77366900  | -0.00002200 |
| C  | -0.67609400 | 0.05425300  | -1.85398700 |
| C  | -0.19844500 | 2.15584300  | 0.00006700  |
| O  | -0.66499700 | -0.22373600 | 2.95603600  |
| O  | 0.09126900  | 3.25519800  | 0.00012900  |
| O  | -0.66502600 | -0.22341100 | -2.95611200 |
| O  | -3.61622500 | 1.04987000  | -0.00005100 |
| C  | -1.31610000 | -1.68152100 | -0.00004300 |
| O  | -2.49373800 | -1.99823200 | 0.00042200  |
| C  | -0.28906500 | -2.80478500 | -0.00047000 |
| H  | -0.79411600 | -3.77210600 | -0.00063000 |
| H  | 0.36382200  | -2.70504100 | 0.86818300  |
| H  | 0.36366300  | -2.70462900 | -0.86918800 |
| I  | 2.09196200  | -0.11129300 | 0.00003100  |

# **PC2'**

|    |             |            |             |
|----|-------------|------------|-------------|
| Mn | -0.25966900 | 0.99272800 | 0.00001500  |
| C  | -0.12334500 | 0.79455500 | -1.88169400 |
| C  | 0.30359900  | 2.75153800 | 0.00009000  |
| C  | -0.12314300 | 0.79435300 | 1.88168500  |
| C  | -2.07346300 | 1.49466500 | 0.00015400  |
| O  | 0.00997500  | 0.64700400 | -2.99693300 |
| O  | -3.15884800 | 1.82687400 | 0.00023500  |
| O  | 0.01027600  | 0.64670300 | 2.99689900  |
| O  | 0.61467800  | 3.84364800 | 0.00015100  |
| C  | 1.79303200  | 0.50189900 | -0.00020700 |

|   |             |             |             |
|---|-------------|-------------|-------------|
| O | 2.68309100  | 1.32577800  | -0.00064000 |
| C | 2.32311400  | -0.97235100 | 0.00013900  |
| F | 3.66209300  | -1.05656400 | -0.00011200 |
| F | 1.89797900  | -1.63337100 | -1.08493300 |
| F | 1.89844200  | -1.63273400 | 1.08578000  |
| I | -1.40579300 | -1.59287200 | -0.00010800 |

**Mn(CO)<sub>4</sub>I<sup>-</sup>**

|    |             |             |             |
|----|-------------|-------------|-------------|
| Mn | -0.74464500 | -0.00012200 | -0.00009000 |
| C  | -0.78121400 | 1.91151600  | 0.00016800  |
| C  | -1.91372600 | 0.00059200  | -1.52011600 |
| C  | -1.91166500 | -0.00087200 | 1.52191800  |
| C  | -0.78057900 | -1.91179500 | -0.00118400 |
| O  | -0.87446100 | 3.04780200  | 0.00014400  |
| O  | -0.87338900 | -3.04811200 | -0.00186100 |
| O  | -2.64071600 | -0.00141200 | 2.40948300  |
| O  | -2.64398700 | 0.00123800  | -2.40674000 |
| I  | 2.02263500  | 0.00019400  | -0.00020100 |

**CH<sub>3</sub>I-Mn(CO)<sub>3</sub><sup>-</sup>**

|    |             |             |             |
|----|-------------|-------------|-------------|
| Mn | 0.76115600  | -0.02265000 | -0.00039900 |
| C  | 2.04281400  | -0.12234100 | -1.26699400 |
| C  | 2.04095400  | -0.12287000 | 1.26787200  |
| C  | 0.58970000  | 1.83067500  | -0.00001800 |
| O  | 2.84272300  | -0.30513200 | 2.06446000  |
| O  | 2.84578300  | -0.30417200 | -2.06245400 |
| O  | 0.54742800  | 2.96966800  | 0.00047700  |
| C  | 0.83725900  | -2.13091300 | -0.00062900 |
| H  | 1.82159800  | -2.60958300 | -0.00053100 |
| H  | 0.28790400  | -2.48379400 | 0.87726400  |
| H  | 0.28802000  | -2.48370000 | -0.87862600 |
| I  | -1.96940100 | -0.14088500 | -0.00017700 |

**CF<sub>3</sub>I-Mn(CO)<sub>3</sub><sup>-</sup>**

|    |             |             |             |
|----|-------------|-------------|-------------|
| Mn | 0.48445500  | 0.50213200  | 0.00002700  |
| C  | 1.72046200  | 0.83677800  | -1.30780400 |
| C  | 1.72163900  | 0.83578400  | 1.30690500  |
| C  | -0.18826400 | 2.26177200  | 0.00083600  |
| O  | 2.48625800  | 1.00172000  | 2.13421600  |
| O  | 2.48427600  | 1.00348000  | -2.13569300 |
| O  | -0.56063500 | 3.33477500  | 0.00142700  |
| C  | 1.14412800  | -1.47440100 | -0.00012000 |
| I  | -2.07891900 | -0.28907000 | -0.00003000 |

|   |            |             |             |
|---|------------|-------------|-------------|
| F | 0.76251200 | -2.22403000 | 1.08138100  |
| F | 2.52584000 | -1.62813400 | -0.00373300 |
| F | 0.75657900 | -2.22694500 | -1.07738200 |
